# Supplementary material for: Genome Sequences of Populus tremula Chloroplast and Mitochondrion: Implications for Holistic Poplar Breeding
Source: PubMed Central journal article supplement (PMC4723046; doi:10.1371/journal.pone.0147209), 2016-01-22
Supplement: pone.0147209.s008.pdf [file pone.0147209.s008.pdf]

|                   | 1 | 2     | 3     | 4     | 5     | 6     | 7     | 8     | 9     |
|-------------------|---|-------|-------|-------|-------|-------|-------|-------|-------|
| P_balsamifera     | 1 | 98.83 | 98.48 | 97.50 | 98.39 | 97.67 | 97.65 | 97.47 | 97.89 |
| P_trichocarpa     | 2 | 98.83 | 99.39 | 97.74 | 98.67 | 98.05 | 98.09 | 97.95 | 98.34 |
| P_euphratica      | 3 | 98.48 | 99.39 | 97.64 | 98.34 | 97.97 | 98.02 | 97.86 | 98.23 |
| P_tremula_717-1B4 | 4 | 97.50 | 97.74 | 97.64 | 97.57 | 97.80 | 97.50 | 98.99 | 98.34 |
| P_fremontii       | 5 | 98.39 | 98.67 | 98.34 | 97.57 | 97.57 | 97.59 | 97.46 | 97.83 |
| P_yunnanensis     | 6 | 97.67 | 98.05 | 97.97 | 97.80 | 97.57 | 98.41 | 98.09 | 98.67 |
| P_cathayana       | 7 | 97.65 | 98.09 | 98.02 | 97.50 | 97.59 | 98.41 | 97.82 | 98.33 |
| P_tremula_W52     | 8 | 97.47 | 97.95 | 97.86 | 98.99 | 97.46 | 98.09 | 97.82 | 98.74 |
| P_alba            | 9 | 97.89 | 98.34 | 98.23 | 98.34 | 97.83 | 98.67 | 98.33 | 98.74 |
