# Supplementary material for: Genome Sequences of Populus tremula Chloroplast and Mitochondrion: Implications for Holistic Poplar Breeding
Source: PubMed Central journal article supplement (PMC4723046; doi:10.1371/journal.pone.0147209), 2016-01-22

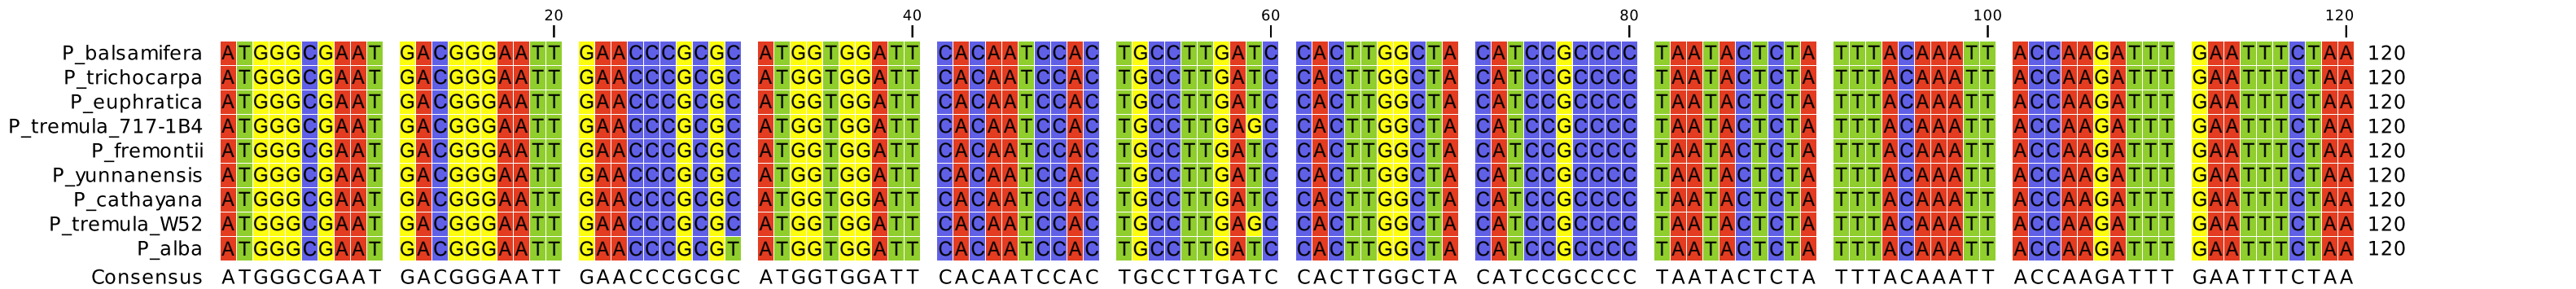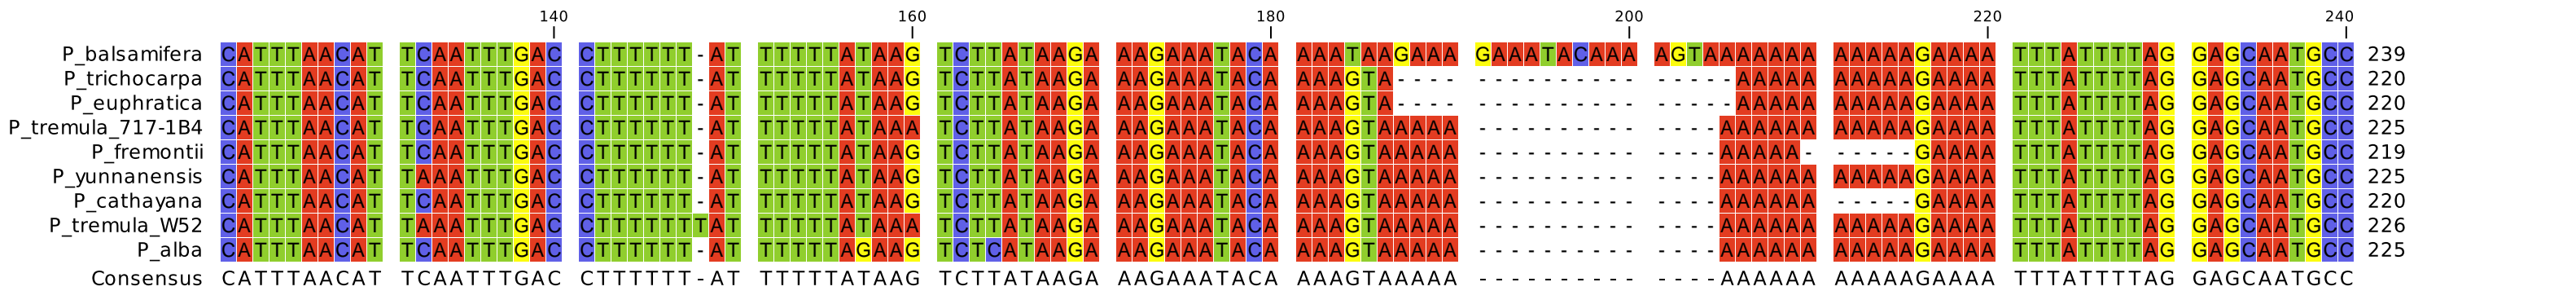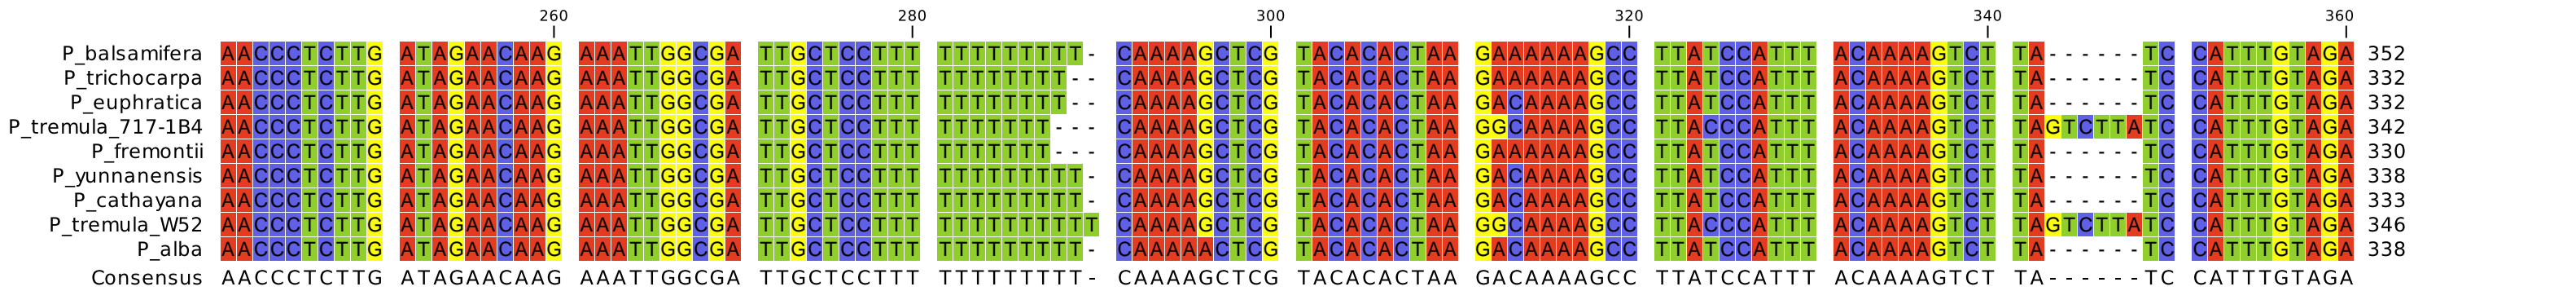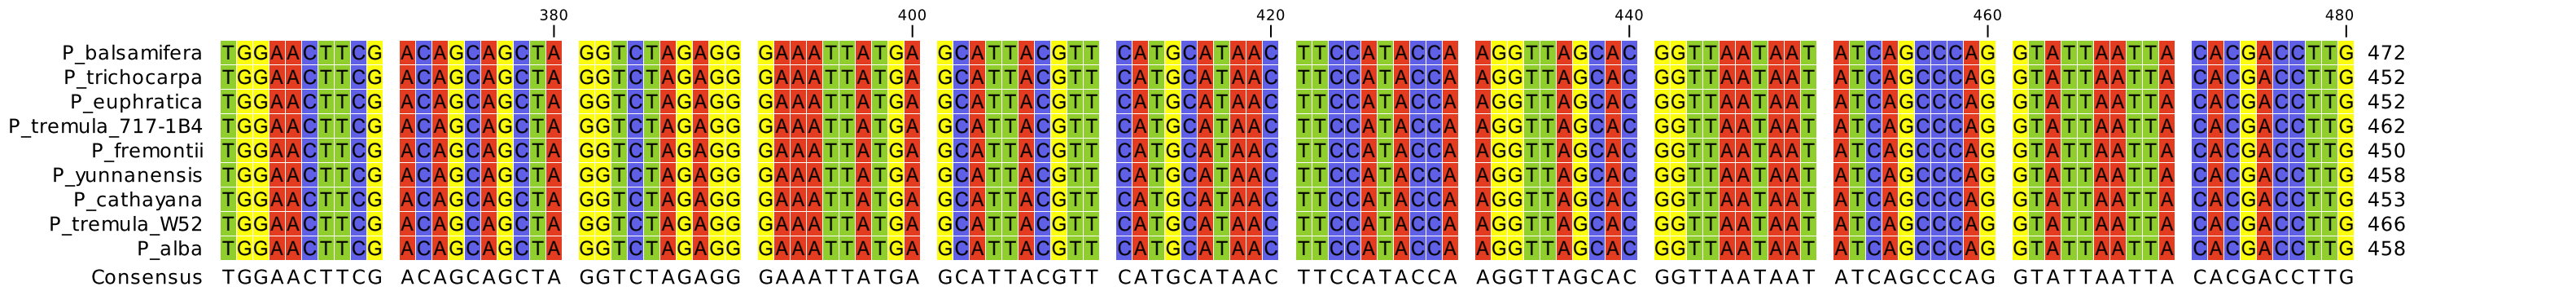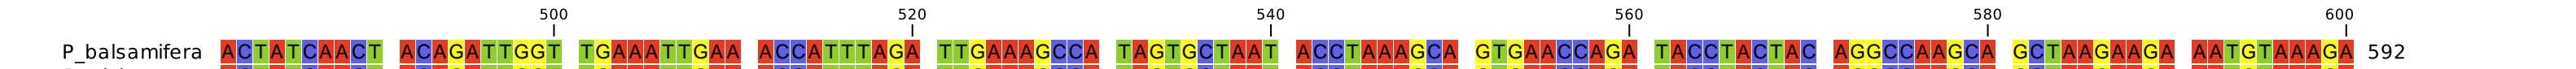

Supplement: pone.0147209.s010.pdf [file pone.0147209.s010.pdf]
